# Supplementary material
Source: PubMed Central journal article supplement (PMC9936894)
Supplement: i1945-5763-29-1-42_s01.pdf [file i1945-5763-29-1-42_s01.pdf]

**eTable 1.** Search strategy used to identify articles for the scoping review

| Database – CINAHL, PsycINFO, Medline (PubMed) |                                                                                                                                                                                                                                                                                                                                                                                                                                                                                   |
|-----------------------------------------------|-----------------------------------------------------------------------------------------------------------------------------------------------------------------------------------------------------------------------------------------------------------------------------------------------------------------------------------------------------------------------------------------------------------------------------------------------------------------------------------|
| <i>Search String 1</i>                        | “spinal cord injur*” or paraplegi* or tetraplegi* or quadriplegi* or “complete spinal cord injur*” or “incomplete spinal cord injur*” or “Brown-Séquard syndrome” or “anterior cord syndrome” or “posterior cord syndrome” or myelomeningocele or “Spina bifida” or “central cord syndrome” AND “quality of life” or “well being” or well-being or “health related quality of life” AND “physical health” and “mental health”                                                     |
| <i>Search String 2</i>                        | “spinal cord injur*” or paraplegi* or tetraplegi* or quadriplegi* or “complete spinal cord injur*” or “incomplete spinal cord injur*” or “Brown-Séquard syndrome” or “anterior cord syndrome” or “posterior cord syndrome” or myelomeningocele or “Spina bifida” or “central cord syndrome” AND “quality of life” or “well being” or well-being or “health related quality of life” AND “public infrastructure” or housing or transportation or neighbo*rhod or Built-environment |
| <i>Search String 3</i>                        | “spinal cord injur*” or paraplegi* or tetraplegi* or quadriplegi* or “complete spinal cord injur*” or “incomplete spinal cord injur*” or “Brown-Séquard syndrome” or “anterior cord syndrome” or “posterior cord syndrome” or myelomeningocele or “Spina bifida” or “central cord syndrome” AND “quality of life” or “well being” or well-being or “health related quality of life” AND “social attitudes” or stigma* or stereotyp* or ableism or “social belief*”                |
| <i>Search String 4</i>                        | “spinal cord injur*” or paraplegi* or tetraplegi* or quadriplegi* or “complete spinal cord injur*” or “incomplete spinal cord injur*” or “Brown-Séquard syndrome” or “anterior cord syndrome” or “posterior cord syndrome” or myelomeningocele or “Spina bifida” or “central cord syndrome” AND “quality of life” or “well being” or well-being or “health related quality of life” AND polic* or “healthcare system*” or fund* or “healthcare provider*” or “health information” |
