# Supplementary material
Source: PubMed Central journal article supplement (PMC9936894)
Supplement: i1945-5763-29-1-42_s03.pdf [file i1945-5763-29-1-42_s03.pdf]

**eTable 3.** Results from inductive content analysis: modifiable factors impacting health and QOL

| <b>Authors</b>            | <b>Sociostructural factors</b>                                                 | <b>Environmental factors</b>                                                 |
|---------------------------|--------------------------------------------------------------------------------|------------------------------------------------------------------------------|
| Barclay et al. (2015)     | Social attitudes, funding and policies                                         | Built environment, transportation, assistive technology, natural environment |
| Barclay et al. (2017)     | Social attitudes, funding and policies                                         | Transportation, assistive technology                                         |
| Bökel et al. (2020)       | Social attitudes, health care access                                           | Housing, transportation, natural environment                                 |
| Botticello et al. (2015)  | N/A                                                                            | Built environment                                                            |
| Burkell et al. (2006)     | Health care access, information access                                         | N/A                                                                          |
| Buscemi et al. (2016)     | Health care access                                                             | N/A                                                                          |
| Carpenter et al. (2007)   | Funding and policies                                                           | Built environment, transportation                                            |
| Drainoni et al. (2004)    | Information access                                                             | Assistive technology                                                         |
| Duggan & Dijkers (2001)   | Funding and policies                                                           | Housing                                                                      |
| Gallagher et al. (2020)   | Health care access, funding and policies                                       | Built environment, assistive technology                                      |
| Glennie et al. (2017)     | N/A                                                                            | Built environment                                                            |
| Goodridge et al. (2015)   | Social attitudes, health care access, information access, funding and policies | Built environment, housing, transportation, assistive technology             |
| Hammell (2004)            | Funding and policies                                                           | Assistive technology                                                         |
| Hampton et al. (2011)     | Health care access, information access                                         | N/A                                                                          |
| Jalovic & Pentland (2009) | Health care access                                                             | N/A                                                                          |
| Johnston et al. (2005)    | Information access                                                             | N/A                                                                          |
| Kehn & Kroll (2009)       | Health care access, information access, funding and policies                   | Built environment                                                            |
| Krause (2007)             | Social attitudes                                                               | N/A                                                                          |
| Manns & Chad (2001)       | Social attitudes, funding and policies                                         | Built environment, transportation, natural environment                       |
| Manns & May (2007)        | Social attitudes, health care access, information access                       | Built environment                                                            |
| Matsuda et al. (2005)     | Healthcare access, funding and policies                                        | N/A                                                                          |
| Mattar et al. (2015)      | Information access, funding and policies                                       | Assistive technology                                                         |
| Monden et al. (2021)      | Social attitudes                                                               | N/A                                                                          |

*(continues)*

**eTable 3.** Results from inductive content analysis: modifiable factors impacting health and QOL (*cont.*)

| <b>Authors</b>              | <b>Sociostructural factors</b>                             | <b>Environmental factors</b>                                                          |
|-----------------------------|------------------------------------------------------------|---------------------------------------------------------------------------------------|
| Mortenson et al. (2015)     | Funding and policies                                       | Built environment, transportation, natural environment                                |
| Neri & Kroll (2003)         | Social attitudes, health care access, funding and policies | Built environment                                                                     |
| Norman et al. (2010)        | Health care access, information access                     | N/A                                                                                   |
| Scheer et al. (2003)        | Funding and policies                                       | Built environment, transportation, assistive technology                               |
| Schladen et al. (2011)      | Health care access                                         | N/A                                                                                   |
| Verdonck et al. (2011)      | N/A                                                        | Assistive technology                                                                  |
| Wearmouth & Wielandt (2009) | Health care access                                         | Built environment, housing, transportation, assistive technology, natural environment |
| Whiteneck et al. (2004)     | Social attitudes, information access                       | Built environment, transportation, natural environment                                |

*Note:* N/A = not applicable; QOL = quality of life.
